# Supplementary material
Source: ML conference proceedings conference paper supplement (https://proceedings.neurips.cc/paper_files/paper/2019/hash/73983c01982794632e0270cd0006d407-Abstract.html)
Supplement: Supplementary file [file 73983c01982794632e0270cd0006d407-Supplemental.zip]

## A Supplementary Material

### A.1 Bi-criteria approximation for $k$ -center

For the analysis, and subsequently the proof of Theorem 1.2, we use a slightly different potential function. The potential from (1) is tricky to control when  $\ell > k$ , as  $n_t$  can become 0. Also, we will use  $|\mathcal{F}_t|$  instead of  $|\mathcal{F}_t \cap X_{\text{in}}|$ . The potential is thus simply

$$\Psi_t := w_t |\mathcal{F}_t|. \quad (4)$$

As before, the following lemma bounds the increase in the potential, conditioned on the chosen centers  $S_t$ .

**Lemma 3.** *For any  $t \geq 0$  and any  $S_t \subseteq X$ ,*

$$\mathbb{E}_{t+1} [\Psi_{t+1} - \Psi_t \mid S_t] \leq z.$$

*Proof.* The proof is along the lines of that of Lemma 1. As before, define  $E_i^{(t)} = |C_i \cap \mathcal{F}_t|$ , and let  $e_i = |E_i^{(t)}|$  and write  $F = \sum_i e_i$ . Once again, if the point chosen in the  $(t+1)$ th iteration is from  $C_i$ , then the quantity  $|\mathcal{F}_t|$  reduces by at least  $e_i$ . Thus we have

$$\begin{aligned} \mathbb{E}_{t+1} [\Psi_{t+1}] &\leq \sum_i \frac{e_i}{|\mathcal{F}_t|} w_t (|\mathcal{F}_t| - e_i) + \left(1 - \frac{F}{|\mathcal{F}_t|}\right) (w_t + 1) |\mathcal{F}_t| \\ &= \Psi_t - \frac{w_t}{|\mathcal{F}_t|} \sum_i e_i^2 + \left(1 - \frac{F}{|\mathcal{F}_t|}\right) |\mathcal{F}_t| \quad (\text{using } \sum_i e_i = F) \\ &\leq \Psi_t + \left(1 - \frac{F}{|\mathcal{F}_t|}\right) |\mathcal{F}_t| \leq \Psi_t + z. \end{aligned} \quad (5)$$

The first equality is obtained by rearranging the terms appropriately. In the last step, we used  $|\mathcal{F}_t| - F \leq z$ , as before. This completes the proof of the lemma.  $\square$

We can now complete the proof of Theorem 1.2.

*Proof of Theorem 1.2.* Consider running the algorithm for  $\ell = k(1+c)$  steps. By a repeated application of Lemma 3, we have that

$$\mathbb{E}[\Psi_\ell] \leq k(1+c)z.$$

Thus by Markov's inequality, we have that for any  $\delta > 0$ , the probability of the event  $\Psi_\ell \leq \frac{k(1+c)z}{(1-\delta)}$  is at least  $\delta$ . Next, using the definition of  $\Psi_\ell$ , we have that with probability at least  $\delta$ ,

$$w_\ell |\mathcal{F}_\ell| \leq \frac{k(1+c)z}{(1-\delta)}.$$

Now, if the algorithm is run for  $k(1+c)$  iterations, at least  $kc$  iterations are “wasted” (because once we pick a point from a cluster, the rest of the points get removed from  $\mathcal{F}_t$ ). Thus we have  $w_\ell \geq kc$ . Thus with probability at least  $\delta$ , we have  $|\mathcal{F}_\ell| \leq \frac{k(1+c)}{c(1-\delta)}$ .

Thus given any  $\delta > 0$ , we can repeat the algorithm  $O(1/\delta)$  times, and with high probability (at least  $3/4$ , say) one of the trials results in  $|\mathcal{F}_\ell| \leq \frac{k(1+c)}{c(1-\delta)}$ . This completes the proof of the theorem.  $\square$

### A.2 Logarithmic approximation for $k$ -means

In this section, we focus on proving Theorem 3.1.

380 **Notation.** In the remainder of the proof, we denote  $\phi(x, S) = d(x, S)^2$ , and  $\phi(U, S) =$   
 381  $\sum_{u \in U} d(u, S)^2$ , for any  $U, S \subseteq X$ . We will also let  $C_1, C_2, \dots, C_k$  denote the optimal clusters.  
 382 Thus we have  $X_{\text{in}} = \cup_i C_i$ .

383 The following is the so-called “parallel-axis theorem” (see, e.g., [4]).

384 **Proposition 1.** *Let  $C \subset \mathbb{R}^d$  and let  $\mu = \frac{1}{|C|} \sum_{x \in C} x$ . Let  $p$  be an arbitrary point in  $\mathbb{R}^d$ . Then*

$$\phi(C, \{p\}) = \phi(C, \{\mu\}) + |C| \cdot \|p - \mu\|^2.$$

385 The next two lemmas are taken from [4].

386 **Lemma 4** (Lemma 3.2 from [4]). *Let  $C \subset \mathbb{R}^d$  be any set of points with mean  $\mu$ . Let  $x$  be a point*  
 387 *chosen uniformly at random from  $C$ . Then*

$$\mathbb{E}[\phi(C, \{x\})] = 2\phi(C, \{\mu\}) \quad (6)$$

388 The next lemma shows that if instead of the uniform distribution over  $C$  (in Lemma 4), we choose  
 389 each  $x \in C$  with probability proportional to  $\phi(x, T)$  for any set  $T$ , a similar inequality holds.

390 **Lemma 5** (Lemma 3.3 from [4]). *Let  $C \subset \mathbb{R}^d$  be a set of points with mean  $\mu$ , and let  $T \subseteq \mathbb{R}^d$  be*  
 391 *another arbitrary set. Then we have*

$$\sum_{x \in C} \frac{\phi(x, T)}{\phi(C, T)} \cdot \phi(C, T \cup \{x\}) \leq 8\phi(C, \{\mu\}). \quad (7)$$

392 The main technical ingredient of our proof is proving that a similar inequality holds if points  $x \in C$   
 393 are sampled proportional to  $\tau(x, T)$  instead of  $\phi(x, T)$ .

394 **Lemma 6.** *Let  $C \subset \mathbb{R}^d$  be a set of points with mean  $\mu$ , and let  $T \subseteq \mathbb{R}^d$  be another arbitrary set.*  
 395 *Then we have*

$$\sum_{x \in C} \frac{\tau(x, T)}{\tau(C, T)} \cdot \phi(C, T \cup \{x\}) \leq 64\phi(C, \{\mu\}). \quad (8)$$

396 For convenience, let us write  $\Theta = \beta \text{OPT}/z$ . We also denote  $\phi^*(C) := \phi(C, \{\mu\})$ .

397 To prove the lemma, we first show the following about the values  $\{d(x, T)^2\}_{x \in C}$ . This lemma will  
 398 assume that  $\phi(C, T) \geq 64\phi^*(C)$  (else Lemma 6 is trivial).

399 **Lemma 7.** *Suppose  $\phi(C, T) \geq 64\phi^*(C)$ . Then we have the following:*

400 1.  $\phi(C, T) \leq \frac{64}{31}|C|d(\mu, T)^2$ .

401 2. Let  $S \subseteq C$  be defined as  $\{x \in C : d(x, T)^2 \in [\frac{1}{3}d(\mu, T)^2, \frac{7}{3}d(\mu, T)^2]\}$ . Then we have  
 402  $|S| \geq \frac{25}{31}|C|$ .

403 Roughly speaking, the lemma says that  $d(x, T)^2$  values are *fairly uniform*, i.e., many of the values  
 404 are close to  $d(\mu, T)^2$ .

405 *Proof.* We start by noting that by the triangle inequality (i.e.,  $\|x - y\|^2 \leq 2(\|x - z\|^2 + \|z - y\|^2)$ ),  
 406 we have for any  $x \in C$ ,

$$\frac{1}{2}d(\mu, T)^2 - \|x - \mu\|^2 \leq d(x, T)^2 \leq 2(\|x - \mu\|^2 + d(\mu, T)^2). \quad (9)$$

407 Summing the inequality on the right over all  $x \in C$ , we have

$$\phi(C, T) \leq 2|C|d(\mu, T)^2 + 2\phi^*(C).$$

408 Using the assumption that  $\phi^*(C) \leq \phi(C, T)/64$  and simplifying, we get the first part of the lemma.  
 409 For the second part, define

$$S' = \{x \in C : \|x - \mu\|^2 \leq \frac{1}{6}d(\mu, T)^2\}.$$

410 By (9), we have that  $S' \subseteq S$ . Thus it suffices to lower bound  $|S'|$ . To do this, note that by Markov's  
 411 inequality (since the sum of  $\|x - \mu\|^2$  is  $\phi^*$ ), we have

$$|C \setminus S'| \leq \frac{6\phi^*}{d(\mu, T)^2}.$$

412 Using the first part of the lemma (together with the lower bound on  $d(C, T)$ ), we have that  $d(\mu, T)^2 \geq$   
 413  $31\phi^*(C)/|C|$ . Plugging this into the above, we have

$$|C \setminus S'| \leq \frac{6|C|}{31} \implies |S'| \geq \frac{25}{31}|C|.$$

414 This completes the proof of the lemma.  $\square$

415 We are now ready to prove Lemma 6.

416 *Proof of Lemma 6.* We consider two cases. First, suppose  $\Theta \geq \frac{7}{3}d(\mu, T)^2$ . In this case, for all  $x \in S$   
 417 (as defined in the statement of Lemma 7), we have  $\tau(x, T) = d(x, T)^2 \geq d(\mu, T)/3$ . Thus,

$$\tau(C, T) \geq |S| \cdot \frac{d(\mu, T)^2}{3} \geq \frac{25}{31}|C| \cdot \frac{31}{64} \frac{\phi(C, T)}{|C|} \cdot \frac{1}{3} \geq \frac{\phi(C, T)}{8}.$$

418 This implies that for all  $x \in C$ ,

$$\frac{\tau(x, T)}{\tau(C, T)} \leq 8 \frac{\phi(x, T)}{\phi(C, T)}.$$

419 Thus, we can appeal to (7) to conclude the proof of Lemma 6 in this case.

420 Next, consider the case  $\Theta < \frac{7}{3}d(\mu, T)^2$ . In this case, for all  $x \in S$ , we have  $\tau(x, T) =$   
 421  $\min(\Theta, d(x, T)^2) \geq \Theta/7$ . This implies that

$$\tau(C, T) \geq |S| \frac{\Theta}{7} \geq \frac{25}{31} \cdot \frac{1}{7} \cdot |C| \Theta \geq \frac{|C| \Theta}{10}.$$

422 Now by definition, we have  $\tau(x, T) \leq \Theta$ , and thus for all  $x \in C$ , we have

$$\frac{\tau(x, T)}{\tau(C, T)} \leq \frac{10}{|C|}.$$

423 Thus, we can now appeal to (6) to conclude the proof of the lemma.  $\square$

424 The lemma immediately implies the following.

425 **Corollary 1.** Consider step  $t$  in the execution of Algorithm 2. Let  $x$  be the point chosen at the  
 426  $t$ 'th step. Let  $C$  be one of the optimal clusters, and let  $\phi^*(C)$  be the contribution of the points in  $C$  to  
 427 the optimal cost. Then we have

$$\mathbb{E}[\phi(C, S_{t-1} \cup \{x\}) \mid x \in C] \leq 64 \cdot \phi^*(C), \quad (10)$$

$$\mathbb{E}[\tau(C, S_{t-1} \cup \{x\}) \mid x \in C] \leq 64 \cdot \phi^*(C). \quad (11)$$

428 *Proof.* The proof of (10) follows from Lemma 6, using the fact that  $\phi^*(C) = \phi(C, \{\mu\})$  in the case  
 429 of an optimal cluster  $C$ . Eq. (11) follows from  $\tau(C, S) \leq \phi(C, S)$  for any sets  $C, S$ .  $\square$

430 We are now ready to prove Theorem 3.1. We will define a potential function as before. Consider the  
 431 execution of the algorithm. We say that an optimal cluster  $C_i$  is *covered* at time step  $t$  if  $C_i \cap S_t \neq \emptyset$ .  
 432 The number of *wasted iterations*  $w_t$  until time  $t$  is the number of iterations in which no new cluster  
 433 is covered (this could be due to picking a point in an already-covered cluster, or due to picking an  
 434 outlier). We also denote by  $n_t$  the number of uncovered optimal clusters at time  $t$ . We let  $H_t$  denote  
 435 the union of points in covered (optimal) clusters, and  $U_t$  be the union of points in uncovered (optimal)  
 436 clusters (note that this does not include the outliers). In this notation, define the potential

$$\Psi_t = \frac{w_t \cdot \tau(U_t, S_t)}{n_t}.$$

437 As before, we will bound the expected increase in the potential  $\Psi_{t+1} - \Psi_t$ , conditioned on  $S_t$ .

438 **Lemma 8.** Let  $S_t$  be the set of points chosen in the first  $t$  steps of the algorithm, and consider step  
 439  $(t + 1)$ . We have

$$\mathbb{E}[\Psi_{t+1} - \Psi_t \mid S_t] \leq \frac{\beta \cdot \text{OPT} + \tau(H_t, S_t)}{n_t} \leq \frac{\beta \cdot \text{OPT} + \tau(H_t, S_t)}{k - t}. \quad (12)$$

440 Before proving the lemma, let us see why it implies our theorem. We need another observation.

441 **Lemma 9.** For any  $t > 0$ , we have

$$\mathbb{E}[\tau(H_t, S_t)] \leq 64 \cdot \text{OPT}. \quad (13)$$

442 *Proof.* Note that the expectation in (13) is over  $S_t$ . The lemma is then a direct consequence of  
 443 Lemma 6. A formal proof of this can be shown via an inductive argument. Let  $H'_t$  be the set of  
 444 indices of the covered clusters (recall that  $H_t$  is the union of the points in these clusters). Then we  
 445 claim that for any  $J \subseteq [k]$  of size  $\leq t$ ,

$$\mathbb{E}[\tau(H_t, S_t) \mid H'_t = J] \leq 64 \sum_{j \in J} \phi^*(C_j).$$

446 This claim implies the lemma, by taking an expectation over  $J$ . The claim itself follows easily  
 447 by induction, because we can expand the expectation on the LHS using all the choices for  $H'_{t-1}$ .  
 448 Either no new cluster is covered in step  $t$  (in which case  $H_t = H_{t-1}$ , and we can use the fact that  
 449  $\tau(H_t, S_t) \leq \tau(H_t, S_{t-1})$ ), or a new cluster  $j$  (for some  $j \in J$ ) is covered in step  $t$ , in which case we  
 450 can apply Lemma 6 along with the inductive hypothesis.  $\square$

451 We can now complete the proof of Theorem 3.1.

452 *Proof of Theorem 3.1.* Combining Lemmas 8 and 9 and summing over  $0 \leq t \leq k - 1$ , we get that  
 453  $\mathbb{E}[\Psi_k] \leq (\beta + 64) \log k \cdot \text{OPT}$ .  $\square$

454 Thus it only remains to show Lemma 8.

455 *Proof of Lemma 8.* Conditioned on  $S_t$ , let us evaluate  $\mathbb{E}[\Psi_{t+1}]$ . Let  $V$  denote the indices of the  
 456 uncovered clusters (thus  $|V| = n_t$ ). Then,

$$\mathbb{E}[\Psi_{t+1} \mid S_t] \leq \sum_{i \in V} \frac{\tau(C_i, S_t)}{\tau(X, S_t)} \frac{w_t \tau(U_t \setminus C_i, S_t)}{n_t - 1} + \frac{\tau(X \setminus U_t, S_t)}{\tau(X, S_t)} \frac{(w_t + 1) \tau(U_t, S_t)}{n_t}. \quad (14)$$

457 For convenience, write  $\gamma_i = \tau(C_i, S_t)$ , and let  $\Gamma = \sum_{i \in V} \gamma_i$ . Then (14) can be simplified as,

$$\mathbb{E}[\Psi_{t+1} \mid S_t] = \sum_{i \in V} \frac{w_t \gamma_i (\Gamma - \gamma_i)}{(n_t - 1) \tau(X, S_t)} + \left(1 - \frac{\Gamma}{\tau(X, S_t)}\right) \frac{(w_t + 1) \Gamma}{n_t}.$$

458 As in our analysis for  $k$ -center, we now use the fact that  $\sum_{i \in V} \gamma_i (\Gamma - \gamma_i) \leq \Gamma^2 (1 - \frac{1}{n_t})$ . Plugging  
 459 this in above and simplifying, we have

$$\mathbb{E}[\Psi_{t+1} \mid S_t] \leq \Psi_t + \left(1 - \frac{\Gamma}{\tau(X, S_t)}\right) \frac{\Gamma}{n_t}.$$

460 Now using the fact that  $X \setminus U_t = H_t \cup X_{\text{out}}$ , along with the observation that  $\tau(X_{\text{out}}) \leq \beta \cdot \text{OPT}$   
 461 (which follows from the definition of the threshold), the lemma follows.  $\square$

### 462 A.3 Bi-criteria guarantee for $k$ -means with outliers

463 We now define a slightly different potential. We let  $H_t, U_t$  be defined as before (Section 3.1).

$$\Phi_t := w_t \cdot \tau(X, S_t). \quad (15)$$

464 There are two differences here. First, we do not have a denominator of  $n_t$ . Second, we include  
 465  $\tau(X, S_t)$  instead of  $\tau$  restricted only to the uncovered inlier clusters. This makes the computation  
 466 simpler, while also giving slightly better bounds.

467 **Lemma 10.** *Let  $S_t$  be the points chosen in the first  $t$  steps of the algorithm, and consider step  $(t + 1)$ .*  
 468 *Then for  $S_t$ ,*

$$\mathbb{E}[\Phi_{t+1} - \Phi_t \mid S_t] \leq \beta \text{OPT} + \tau(H_t, S_t).$$

469 Again, assuming Lemma 10, we can use Lemma 9 to conclude the proof of Theorem 3.2.

470 *Proof of Theorem 3.2.* By using Lemma 9 and summing over  $t$ , we have that

$$\mathbb{E}[\Phi_{(1+c)k}] \leq (\beta + 64) \text{OPT}(1 + c)k.$$

471 Thus by Markov's inequality, we have a probability at least  $\delta$  of having

$$\Phi_{(1+c)k} \leq \frac{(\beta + 64)(1 + c)k \cdot \text{OPT}}{(1 - \delta)}.$$

472 Now, whenever we run for  $(1 + c)k$  iterations, at least  $ck$  of them have to be wasted (by definition,  
 473 there cannot be more than  $k$  iterations in which a new cluster is covered). This implies that with  
 474 probability  $\geq \delta$ , the potential  $\tau(X, S_\ell)$  satisfies the desired inequality.  $\square$

475 We now turn to the proof of Lemma 10.

476 *Proof of Lemma 10.* The proof is actually simpler than the one for Lemma 8. We simply use the fact  
 477 that  $\Phi(X, S_t)$  is monotonically decreasing with  $t$  (because we only add elements to  $S_t$ ). Thus,

$$\mathbb{E}[\Phi_{t+1} - \Phi_t] \leq \Pr[w_{t+1} = w_t + 1] \cdot \tau(X, S_t).$$

478 I.e., the increase in potential is bounded by the probability that  $w_t$  increases, times  $\tau(X, S_t)$  (this  
 479 is true since  $w_t$  increases by at most 1 in each iteration). The probability is precisely  $\tau(X \setminus$   
 480  $U_t, S_t) / \tau(X, S_t)$  (i.e., the probability that we choose a point that is not in the uncovered clusters,  
 481 in other words, an outlier or an already covered point). Thus the probability is equal to  $\tau(X_{\text{out}} \cup$   
 482  $H_t, S_t) / \tau(X, S_t)$ . Plugging this into the equation above, we have

$$\mathbb{E}[\Phi_{t+1} - \Phi_t] \leq \tau(X_{\text{out}}, S_t) + \tau(H_t, S_t) \leq \beta \text{OPT} + \tau(H_t, S_t).$$

483 This completes the proof.  $\square$
